# Supplementary material for: Microfabricated porous layer open tubular (PLOT) column
Source: Royal Society of Chemistry journal article supplement (doi:10.1039/c9lc00886a), 2019-01-01
Supplement: c9lc00886a1.pdf [file c9lc00886a1.pdf]

**Supplementary Information for**  
**Microfabricated Porous Layer Open Tubular (PLOT) Column**

Maxwell Wei-Hao Li,<sup>abc</sup> Jinyan She,<sup>ab</sup> Hongbo Zhu,<sup>ab</sup> Ziqi Li,<sup>ad</sup>  
and Xudong Fan<sup>ab\*</sup>

<sup>a</sup>Department of Biomedical Engineering,  
University of Michigan, Ann Arbor, MI 48109, USA

<sup>b</sup>Center for Wireless Integrated MicroSensing and Systems (WIMS<sup>2</sup>),  
University of Michigan, Ann Arbor, MI 48109, USA

<sup>c</sup>Department of Electrical Engineering and Computer Science,  
University of Michigan, Ann Arbor, MI 48109, USA

<sup>d</sup>School of Precision Instruments and Opto-electronics Engineering,  
Tianjin University, Tianjin University, P. R. China

\*Email address: [xsfan@umich.edu](mailto:xsfan@umich.edu)

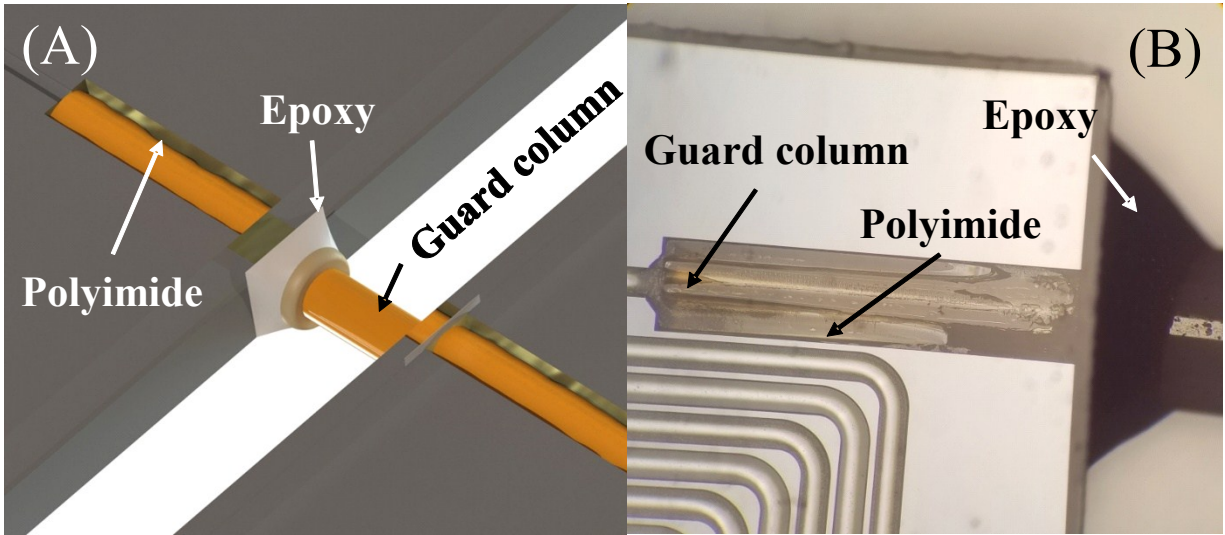

Figure S1. (A) Illustration of hybrid adhesive connection ports. (B) Photo of the connection port.

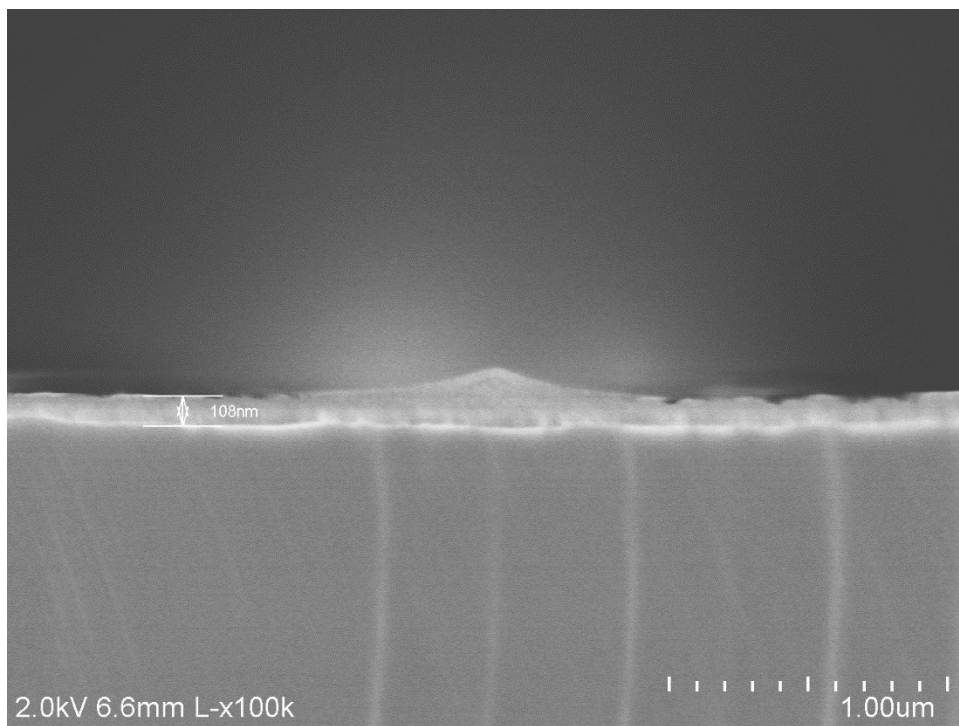

Figure S2. SEM image of film along column wall, with a thickness of approximately 108 nm. This thickness was not included in the calculation for average film thickness due to being much smaller than the amount of stationary phase pooled at the column corners.

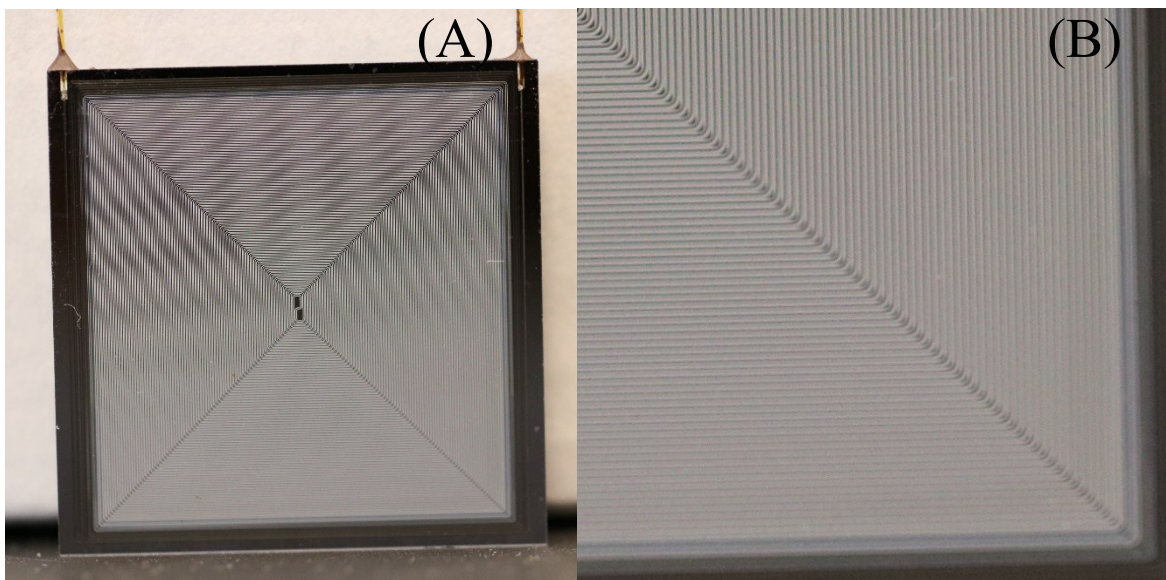

Figure S3. (A) Photograph of  $\mu$ PLOT column. (B) Zoom-in of  $\mu$ PLOT channel pattern.

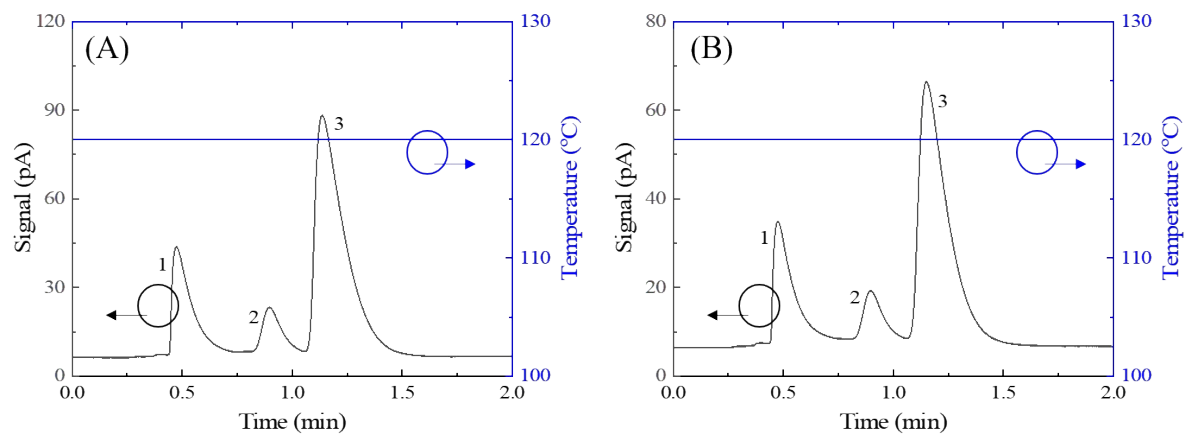

Figure S4. Separation of methanol<sup>(1)</sup>, ethanol<sup>(2)</sup>, and formaldehyde<sup>(3)</sup> with no added moisture (A) and with 1  $\mu\text{L}$  of additional liquid water (B). A solution of formaldehyde, methanol, and ethanol was heated to 80 °C and 50  $\mu\text{L}$  of headspace vapor was subsequently drawn for injection. Carrier gas flow rate: 1.3 mL/min at 120 °C. Analysis is provided in Table S1.

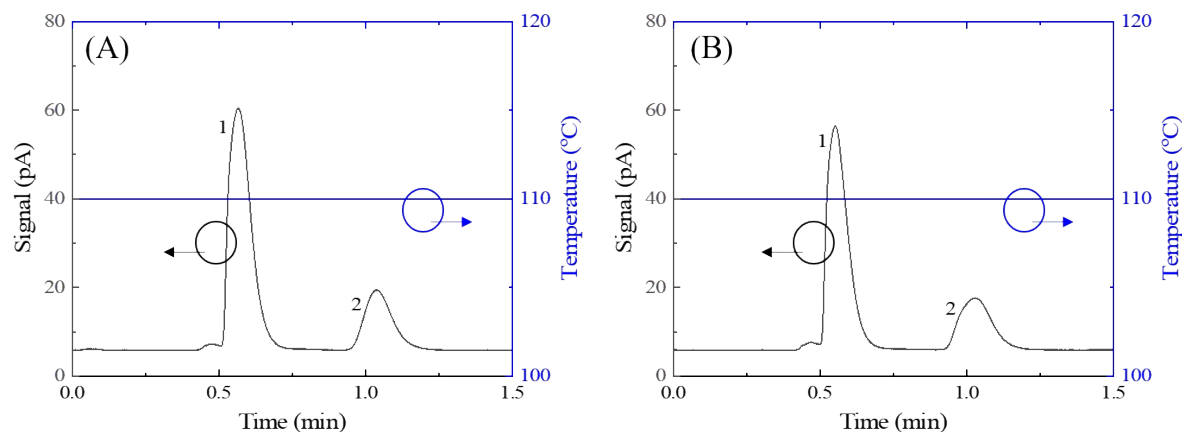

Figure S5. Separation of nonane<sup>(1)</sup> and dodecane<sup>(2)</sup> using an in-house coated OV-5 column (coating procedure detailed below). An injection of 100  $\mu\text{L}$  of headspace vapor from a mixture of the two analytes was made with no added moisture (A) and with 50  $\mu\text{L}$  of additional water vapor (B). The water was heated to 80  $^{\circ}\text{C}$  in order to increase the partial pressure in the headspace. Carrier gas flow rate: 1.3 mL/min. Analysis is provided in Table S2.

Coating procedure. OV-1 (75% w/w), OV-17 (10% w/w), and Dow SYLGARD<sup>TM</sup> 184 reagent B (15% w/w, crosslinker) were dissolved in dichloromethane to create a 2% (w/w) coating solution (effectively a 5% phenyl stationary phase). A 5 m long capillary column (250  $\mu\text{m}$  i.d.) was silanized prior to coating by 8 repeated injections of hexamethyldisilazane (HMDS) vapor. Subsequently, an 80  $\mu\text{L}$  coating solution was loaded into the capillary from the column inlet and driven out through a 1 m dummy column (250  $\mu\text{m}$  i.d.), which ensured a constant coating plug speed (1 cm/min). After coating, dry air was continuously flowed through the column for 2 hours, followed by crosslinking at 80  $^{\circ}\text{C}$  for another 2 hours and subsequent deactivation using HMDS. The column was then aged at 230  $^{\circ}\text{C}$  for 3 hours under a helium flow of 0.5 mL/min.

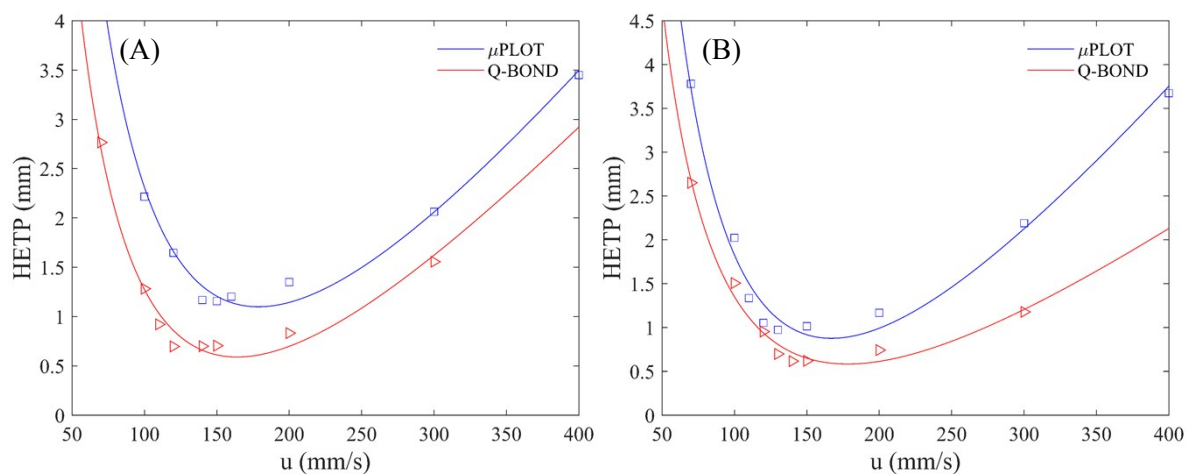

Figure S6. Golay plots with height equivalents to theoretical plates (HETPs) measured for  $\mu$ PLOT and a 5 m long RESTEK Q-BOND. (A) HETP for methanol at a temperature of 105 °C. (B) HETP for butane at a temperature of 130 °C. See Table S3 for more information.

|                                  | Dry                | 1 $\mu$ L          | p-value |
|----------------------------------|--------------------|--------------------|---------|
| Methanol <sup>(1)</sup> RT       | 0.477 $\pm$ 0.0026 | 0.453 $\pm$ 0.0066 | 0.0005  |
| Methanol <sup>(1)</sup> FWHM     | 0.102 $\pm$ 0.0011 | 0.108 $\pm$ 0.0099 | 0.2202  |
| Ethanol <sup>(2)</sup> RT        | 0.898 $\pm$ 0.0019 | 0.885 $\pm$ 0.0127 | 0.0798  |
| Ethanol <sup>(2)</sup> FWHM      | 0.080 $\pm$ 0.0002 | 0.083 $\pm$ 0.0828 | 0.1918  |
| Formaldehyde <sup>(3)</sup> RT   | 1.148 $\pm$ 0.0075 | 1.149 $\pm$ 0.0147 | 0.9119  |
| Formaldehyde <sup>(3)</sup> FWHM | 0.145 $\pm$ 0.0008 | 0.148 $\pm$ 0.0061 | 0.4272  |

Table S1. p-values between retention times (RTs) and FWHMs of methanol, ethanol, and formaldehyde with no added moisture and 1  $\mu$ L of added moisture (5 runs each). Significance was taken at  $p = 0.05$ . Methanol's retention time was significantly lower with added moisture. All other p-values are over 0.5, showing no significant differences (notably, added moisture did not significantly broaden any peaks).



|                              | Dry               | 50 $\mu$ L        | p-value |
|------------------------------|-------------------|-------------------|---------|
| Nonane <sup>(1)</sup> RT     | 0.563 $\pm$ 0.005 | 0.552 $\pm$ 0.004 | 0.051   |
| Nonane <sup>(1)</sup> FWHM   | 0.084 $\pm$ 0.006 | 0.095 $\pm$ 0.002 | 0.049   |
| Dodecane <sup>(2)</sup> RT   | 1.038 $\pm$ 0.004 | 1.032 $\pm$ 0.003 | 0.088   |
| Dodecane <sup>(2)</sup> FWHM | 0.113 $\pm$ 0.003 | 0.141 $\pm$ 0.004 | 0.016   |

Table S2. p-values between retention times (RTs) and FWHMs of nonane and dodecane with no added moisture and 50  $\mu$ L of added moisture (5 runs each). Significance was taken at  $p = 0.05$ . Both peaks were significantly broadened with added moisture, showing that the OV-5 column does not exhibit the same moisture resistance that the  $\mu$ PLOT does.

|                                             | HETP (mm) |
|---------------------------------------------|-----------|
| $\mu$ PLOT in this work (Methanol)          | 1.156     |
| $\mu$ PLOT in this work (Butane)            | 0.974     |
| Restek Q-BOND (Methanol)                    | 0.697     |
| Restek Q-BOND (Butane)                      | 0.617     |
| Ref. [S1] (Butane) <sup>1</sup>             | ~0.2      |
| Ref. [S2] (Methanol) <sup>2</sup>           | ~0.25     |
| Refs. [S3] and [S4] (Butane) <sup>3,4</sup> | ~0.35     |

Table S3. Height equivalents to theoretical plates (HETPs) for divinylbenzene-based PLOT ( $\mu$ PLOT, Q-BOND, and Refs. [S1] and [S2]) and silica-based (Refs. [S3] and [S4]) porous layer columns. HETPs for the  $\mu$ PLOT and Q-BOND were measured based on optimized values obtained from Golay plots (see Figure S6). Other HETPs were estimated based on plots provided in the respective references.

## References

- S[1] Korolev, A. A.; Shiryayeva, V. E.; Popova, T. P.; Kozin, A. V.; D'yachkov, I. A.; Kurganov, A. A. Macroporous polymeric monoliths as stationary phases in gas adsorption chromatography. *Polym. Sci. Ser. A* **2006**, *48*, 779-786.
- S[2] Nesterenko, E. P.; Burke, M.; de Bosset, C.; Pessutto, P.; Malafosse, C.; Collins, D. A. Monolithic porous layer open tubular (monoPLOT) capillary columns for gas chromatography. *RSC Advances* **2015**, *5*, 7890-7896.
- S[3] Korolev, A. A.; Shiryayeva, V. E.; Popova, T. P.; Kurganov, A. A. Effect of the pressure of the carrier gas on the parameters of the Van Deemter equation for monolithic silica gel gas chromatography columns. *Russ. J. Phys. Chem.* **2006**, *80*, 781-785.
- S[4] Korolev, A. A.; Shiryayeva, V. E.; Popova, T. P.; Kurganov, A. A. A study of the efficiency of monolithic silica gel capillary columns for gas chromatography. *Russ. J. Phys. Chem.* **2006**, *80*, 609-614.
